# Supplementary material for: Network-based Phenome-Genome Association Prediction by Bi-Random Walk
Source: PubMed Central journal article supplement (PMC4416812; doi:10.1371/journal.pone.0125138), 2015-05-01
Supplement: pone.0125138.s004.pdf [file pone.0125138.s004.pdf]

**Table S1. CBG statistics on human phenome-genome network (July 2014).** CBG analysis with randomized phenotype-gene network are reported for comparison.

|          | Human phenotype-gene network |          | Randomized phenotype-gene network |          |
|----------|------------------------------|----------|-----------------------------------|----------|
|          | Assoc #                      | Coverage | Avg. of Assoc #                   | Coverage |
| CBG1     | 689                          | 34.68%   | 4.1                               | 0.21%    |
| CBG1 - 2 | 1232                         | 62.00%   | 242.4                             | 12.20%   |
| CBG1 - 3 | 1743                         | 87.72%   | 1407.8                            | 70.85%   |
| CBG1 - 4 | 1894                         | 95.32%   | 1833.9                            | 92.30%   |
| CBG1 - 5 | 1915                         | 96.38%   | 1882.8                            | 94.76%   |
| CBG1 - 6 | 1917                         | 96.48%   | 1890.1                            | 95.12%   |
| CBG1 - 7 | 1922                         | 96.73%   | 1893.2                            | 95.28%   |
| CBG1 - 8 | 1923                         | 96.78%   | 1896.0                            | 95.42%   |
| CBG1 - 9 | 1924                         | 96.83%   | 1899.0                            | 95.57%   |
