# Supplementary material for: Network-based Phenome-Genome Association Prediction by Bi-Random Walk
Source: PubMed Central journal article supplement (PMC4416812; doi:10.1371/journal.pone.0125138), 2015-05-01
Supplement: pone.0125138.s005.pdf [file pone.0125138.s005.pdf]

**Table S2. Parameter tuning for BiRW with 100-fold cross-validation on OMIM May-2007.**

(A) This table reports the average AUCs across all the phenotypes by converged balanced BiRW( $l = r$ ) with different parameter  $\alpha$ . The number of phenotypes with AUC more than 0.9 and 0.7 are also reported. The chosen  $\alpha = 0.8$  is among the best  $\alpha$ s.

| $\alpha$   | 0.1   | 0.2   | 0.3   | 0.4   | 0.5   | 0.6          | 0.7          | 0.8          | 0.9   |
|------------|-------|-------|-------|-------|-------|--------------|--------------|--------------|-------|
| AUC        | 0.741 | 0.760 | 0.764 | 0.773 | 0.776 | <b>0.777</b> | <b>0.777</b> | <b>0.777</b> | 0.775 |
| $\geq 0.9$ | 527   | 590   | 613   | 626   | 626   | 625          | 625          | <b>629</b>   | 624   |
| $\geq 0.7$ | 711   | 758   | 770   | 789   | 795   | 801          | 800          | 797          | 791   |

(B) The tables report the  $AUC_{50}$ ,  $AUC_{100}$  and  $AUC_{300}$  by BiRW with the step parameter  $l$  and  $r$  (range from 1 to 5), where the parameter  $\alpha$  is fixed as 0.8 based on the result in Fig 1A. The bold AUC scores are the best ones. Based on the results, the BiRW parameters are chosen as  $\alpha=0.8$ ,  $l = 4$  and  $r = 4$  in 100-fold cross-validation.

**B1.  $AUC_{50}$** 

|       | $r = 1$ | 2      | 3      | 4             | 5      |
|-------|---------|--------|--------|---------------|--------|
| $l=1$ | 0.0066  | 0.0066 | 0.0066 | 0.0066        | 0.0066 |
| 2     | 0.3883  | 0.3883 | 0.1732 | 0.3307        | 0.1752 |
| 3     | 0.3872  | 0.4084 | 0.4123 | 0.2756        | 0.3151 |
| 4     | 0.3834  | 0.3926 | 0.4115 | <b>0.4137</b> | 0.2741 |
| 5     | 0.3807  | 0.3837 | 0.3938 | 0.4113        | 0.4113 |

**B2.  $AUC_{100}$** 

|       | $r = 1$ | 2      | 3      | 4             | 5      |
|-------|---------|--------|--------|---------------|--------|
| $l=1$ | 0.0118  | 0.0118 | 0.0118 | 0.0118        | 0.0118 |
| 2     | 0.4196  | 0.4196 | 0.2239 | 0.3815        | 0.2366 |
| 3     | 0.4179  | 0.4478 | 0.4562 | 0.3445        | 0.3680 |
| 4     | 0.4149  | 0.4277 | 0.4519 | <b>0.4595</b> | 0.3413 |
| 5     | 0.4122  | 0.4165 | 0.4317 | 0.4520        | 0.4578 |

**B3.  $AUC_{300}$** 

|       | $r = 1$ | 2      | 3      | 4             | 5      |
|-------|---------|--------|--------|---------------|--------|
| $l=1$ | 0.0383  | 0.0383 | 0.0383 | 0.0383        | 0.0383 |
| 2     | 0.4595  | 0.4595 | 0.3020 | 0.4719        | 0.3450 |
| 3     | 0.4584  | 0.5085 | 0.5173 | 0.4437        | 0.4637 |
| 4     | 0.4560  | 0.4813 | 0.5155 | <b>0.5243</b> | 0.4391 |
| 5     | 0.4535  | 0.4617 | 0.4874 | 0.5165        | 0.5241 |
