# Supplementary material for: Network-based Phenome-Genome Association Prediction by Bi-Random Walk
Source: PubMed Central journal article supplement (PMC4416812; doi:10.1371/journal.pone.0125138), 2015-05-01
Supplement: pone.0125138.s006.pdf [file pone.0125138.s006.pdf]

**Table S3. Parameter tuning for PRINCE in 100-fold cross-validation on OMIM May-2007.**  
 This table reports the average AUCs across all phenotypes for PRINCE with the balance parameter  $\alpha$ .

|        | $\alpha$   | 0.1          | 0.2   | 0.3   | 0.4   | 0.5   | 0.6   | 0.7   | 0.8   | 0.9   |
|--------|------------|--------------|-------|-------|-------|-------|-------|-------|-------|-------|
| PRINCE | AUC        | <b>0.751</b> | 0.745 | 0.744 | 0.744 | 0.746 | 0.746 | 0.745 | 0.746 | 0.745 |
|        | $\geq 0.9$ | 568          | 570   | 567   | 569   | 574   | 573   | 574   | 576   | 577   |
|        | $\geq 0.7$ | 735          | 734   | 735   | 735   | 732   | 730   | 731   | 732   | 737   |
