# Supplementary material for: Network-based Phenome-Genome Association Prediction by Bi-Random Walk
Source: PubMed Central journal article supplement (PMC4416812; doi:10.1371/journal.pone.0125138), 2015-05-01
Supplement: pone.0125138.s007.pdf [file pone.0125138.s007.pdf]

**Table S4. Performance of CIPHER by 100-fold cross-validation on OMIM May-2007.** The table reports the average AUCs across all phenotypes for CIPHER SP (shortest path in PPI) and CIPHER DN (direct neighbor).

|            | SP    | DN    |
|------------|-------|-------|
| AUC        | 0.494 | 0.602 |
| $\geq 0.9$ | 116   | 161   |
| $\geq 0.7$ | 342   | 459   |
