# Supplementary material for: Network-based Phenome-Genome Association Prediction by Bi-Random Walk
Source: PubMed Central journal article supplement (PMC4416812; doi:10.1371/journal.pone.0125138), 2015-05-01
Supplement: pone.0125138.s008.pdf [file pone.0125138.s008.pdf]

**Table S5. AUCs of the cross-validation on OMIM May-2007.** The table reports a comparison of the ranking results by BiRW and four other methods, PRINCE, RWRH, CIPHER SP and CIPHER DN. The parameters  $\alpha$ ,  $l$  and  $r$  of BiRW are set by the experimental results in 100-fold cross-validation. AUCs up to 50, 100, 300, 500, 1000 and all false positives are reported.

|                   | AUC <sub>50</sub> | AUC <sub>100</sub> | AUC <sub>300</sub> | AUC <sub>500</sub> | AUC <sub>1000</sub> | AUC    |
|-------------------|-------------------|--------------------|--------------------|--------------------|---------------------|--------|
| BiRW(0.8,4,4)     | 0.4137            | 0.4595             | 0.5243             | 0.5512             | 0.5897              | 0.8063 |
| PRINCE(0.1)       | 0.4008            | 0.4353             | 0.4842             | 0.5036             | 0.5368              | 0.7909 |
| RWRH(0.5,0.7,0.5) | 0.2676            | 0.3056             | 0.3684             | 0.4002             | 0.4503              | 0.7475 |
| CIPHER SP         | 0.0048            | 0.0082             | 0.0236             | 0.0364             | 0.0666              | 0.4942 |
| CIPHER DN         | 0.0058            | 0.0093             | 0.0317             | 0.0479             | 0.0859              | 0.6017 |
