# Supplementary material for: Network-based Phenome-Genome Association Prediction by Bi-Random Walk
Source: PubMed Central journal article supplement (PMC4416812; doi:10.1371/journal.pone.0125138), 2015-05-01
Supplement: pone.0125138.s009.pdf [file pone.0125138.s009.pdf]

**Table S6. AUCs of the prediction of the new disease genes in OMIM July-2014.** The table reports a comparison of the ranking results by BiRW and 4 baselines, PRINCE, RWRH, CIPHER SP and CIPHER DN. The parameters  $\alpha$ ,  $l$  and  $r$  of BiRW are set by the experimental results in 100-fold cross-validation. AUCs up to 50, 100, 300, 500, 1000 and all false positives are reported.

|                     | AUC <sub>50</sub> | AUC <sub>100</sub> | AUC <sub>300</sub> | AUC <sub>500</sub> | AUC <sub>1000</sub> | AUC    |
|---------------------|-------------------|--------------------|--------------------|--------------------|---------------------|--------|
| BiRW(0.8,4,4)       | 0.1736            | 0.2115             | 0.2741             | 0.3077             | 0.3687              | 0.7369 |
| PRINCE(0.1)         | 0.1439            | 0.1753             | 0.2310             | 0.2647             | 0.3227              | 0.7244 |
| RWRH(0.5, 0.7, 0.5) | 0.1599            | 0.1936             | 0.2611             | 0.3069             | 0.3849              | 0.7667 |
| CIPHER SP           | 0.1068            | 0.1390             | 0.2165             | 0.2587             | 0.3233              | 0.7039 |
| CIPHER DN           | 0.0935            | 0.1271             | 0.1838             | 0.2191             | 0.2754              | 0.6683 |
