# Supplementary material for: Network-based Phenome-Genome Association Prediction by Bi-Random Walk
Source: PubMed Central journal article supplement (PMC4416812; doi:10.1371/journal.pone.0125138), 2015-05-01
Supplement: pone.0125138.s010.pdf [file pone.0125138.s010.pdf]

**Table S7. A pairwise comparison by paired  $t$ -test of the ranking results in 100-fold cross-validation based on AUCs.**

**(A)  $p$ -values of comparing  $AUC_{50}$**

|           | BiRW(0.8,4,4) | PRINCE(0.1) | RWRH(0.5,0.7,0.5) | CIPHER SP | CIPHER DN |
|-----------|---------------|-------------|-------------------|-----------|-----------|
| BiRW      | NaN           |             |                   |           |           |
| PRINCE    | 0.015         | NaN         |                   |           |           |
| RWRH      | 2.12e-37      | 8.74e-29    | NaN               |           |           |
| CIPHER SP | 5.41e-152     | 3.80e-144   | 9.24e-088         | NaN       |           |
| CIPHER DN | 1.34e-152     | 1.56e-144   | 3.08e-087         | 0.703     | NaN       |

**(B)  $p$ -values of comparing  $AUC_{100}$**

|           | BiRW(0.8,4,4) | PRINCE(0.1) | RWRH(0.5,0.7,0.5) | CIPHER SP | CIPHER DN |
|-----------|---------------|-------------|-------------------|-----------|-----------|
| BiRW      | NaN           |             |                   |           |           |
| PRINCE    | 7.94e-05      | NaN         |                   |           |           |
| RWRH      | 5.17e-38      | 3.90e-25    | NaN               |           |           |
| CIPHER SP | 5.64e-170     | 5.11e-155   | 4.15e-98          | NaN       |           |
| CIPHER DN | 3.53e-171     | 1.73e-156   | 7.37e-98          | 0.688     | NaN       |
