# Supplementary material for: Network-based Phenome-Genome Association Prediction by Bi-Random Walk
Source: PubMed Central journal article supplement (PMC4416812; doi:10.1371/journal.pone.0125138), 2015-05-01
Supplement: pone.0125138.s011.pdf [file pone.0125138.s011.pdf]

**Table S8. A pairwise comparison by paired  $t$ -test of the ranking results in test based on AUCs.**

**(A)  $p$ -values of comparing  $AUC_{50}$**

|           | BiRW(0.8,4,4) | PRINCE(0.1) | RWRH(0.5,0.7,0.5) | CIPHER SP | CIPHER DN |
|-----------|---------------|-------------|-------------------|-----------|-----------|
| BiRW      | NaN           |             |                   |           |           |
| PRINCE    | 1.56E-05      | NaN         |                   |           |           |
| RWRH      | 0.0131        | 0.9683      | NaN               |           |           |
| CIPHER SP | 4.11E-11      | 0.0003      | 2.76E-08          | NaN       |           |
| CIPHER DN | 3.93E-11      | 5.49E-05    | 2.72E-09          | 0.0613    | NaN       |

**(B)  $p$ -values of comparing  $AUC_{100}$**

|           | BiRW(0.8,4,4) | PRINCE(0.1) | RWRH(0.5,0.7,0.5) | CIPHER SP | CIPHER DN |
|-----------|---------------|-------------|-------------------|-----------|-----------|
| BiRW      | NaN           |             |                   |           |           |
| PRINCE    | 1.27E-07      | NaN         |                   |           |           |
| RWRH      | 0.0023        | 0.9836      | NaN               |           |           |
| CIPHER SP | 7.61E-12      | 0.0004      | 3.98E-08          | NaN       |           |
| CIPHER DN | 3.99E-11      | 1.58E-04    | 2.43E-08          | 0.1087    | NaN       |
