# Supplementary material for: Network-based Phenome-Genome Association Prediction by Bi-Random Walk
Source: PubMed Central journal article supplement (PMC4416812; doi:10.1371/journal.pone.0125138), 2015-05-01
Supplement: pone.0125138.s012.pdf [file pone.0125138.s012.pdf]

**Table S9. Performance of BiRW with 100-fold cross-validation on mouse phenome-genome network.** The parameters  $\alpha$ ,  $l$  and  $r$  of BiRW are tuned, and the best AUCs(up to 50, 100, 300, 500, 1000 and all false positives) with parameter  $\alpha$  are reported. Based on the  $AUC_{50}$  results, the BiRW parameters for mouse are chosen as  $\alpha=0.7$ ,  $l=5$  and  $r=1$  in 100-fold cross-validation

**(A)  $AUC_{50}$  ( $\alpha = 0.7$ )**

|       | $r = 1$       | 2      | 3      | 4      | 5      |
|-------|---------------|--------|--------|--------|--------|
| $l=1$ | 0.0048        | 0.0048 | 0.0048 | 0.0048 | 0.0048 |
| 2     | 0.1397        | 0.1397 | 0.0175 | 0.0211 | 0.0179 |
| 3     | 0.1415        | 0.1298 | 0.1137 | 0.0190 | 0.0205 |
| 4     | 0.1416        | 0.1395 | 0.1198 | 0.0887 | 0.0207 |
| 5     | <b>0.1419</b> | 0.1419 | 0.1330 | 0.1087 | 0.0732 |

**(B)  $AUC_{100}$  ( $\alpha = 0.9$ )**

|       | $r = 1$       | 2      | 3      | 4      | 5      |
|-------|---------------|--------|--------|--------|--------|
| $l=1$ | 0.0129        | 0.0129 | 0.0129 | 0.0129 | 0.0129 |
| 2     | 0.2257        | 0.2257 | 0.0367 | 0.0405 | 0.0333 |
| 3     | 0.2284        | 0.2146 | 0.1844 | 0.0383 | 0.0366 |
| 4     | 0.2293        | 0.2236 | 0.1905 | 0.1443 | 0.0363 |
| 5     | <b>0.2297</b> | 0.2270 | 0.2133 | 0.1699 | 0.1138 |

**(C)  $AUC_{300}$  ( $\alpha = 0.9$ )**

|       | $r = 1$       | 2      | 3      | 4      | 5      |
|-------|---------------|--------|--------|--------|--------|
| $l=1$ | 0.0354        | 0.0354 | 0.0354 | 0.0354 | 0.0354 |
| 2     | 0.4395        | 0.4395 | 0.0880 | 0.0981 | 0.0699 |
| 3     | 0.4422        | 0.4200 | 0.3839 | 0.0976 | 0.0938 |
| 4     | 0.4431        | 0.4339 | 0.3904 | 0.3396 | 0.0981 |
| 5     | <b>0.4434</b> | 0.4382 | 0.4180 | 0.3670 | 0.3028 |

**(D)  $AUC_{500}$  ( $\alpha = 0.9$ )**

|       | $r = 1$       | 2      | 3      | 4      | 5      |
|-------|---------------|--------|--------|--------|--------|
| $l=1$ | 0.0535        | 0.0535 | 0.0535 | 0.0535 | 0.0535 |
| 2     | 0.5658        | 0.5658 | 0.1243 | 0.1439 | 0.1074 |
| 3     | 0.5677        | 0.5457 | 0.5128 | 0.1394 | 0.1356 |
| 4     | 0.5684        | 0.5596 | 0.5193 | 0.4655 | 0.1406 |
| 5     | <b>0.5685</b> | 0.5642 | 0.5438 | 0.4959 | 0.4224 |

**(E) AUC<sub>1000</sub> ( $\alpha = 0.9$ )**

|     | r = 1         | 2      | 3      | 4      | 5      |
|-----|---------------|--------|--------|--------|--------|
| l=1 | 0.0926        | 0.0926 | 0.0926 | 0.0926 | 0.0926 |
| 2   | 0.7602        | 0.7602 | 0.1988 | 0.2412 | 0.1744 |
| 3   | 0.7614        | 0.7345 | 0.7011 | 0.2189 | 0.2224 |
| 4   | 0.7616        | 0.7493 | 0.7069 | 0.6548 | 0.2191 |
| 5   | <b>0.7617</b> | 0.7549 | 0.7325 | 0.6820 | 0.6156 |

**(F) AUC ( $\alpha = 0.9$ )**

|     | r = 1         | 2      | 3      | 4      | 5      |
|-----|---------------|--------|--------|--------|--------|
| l=1 | 0.6337        | 0.6337 | 0.6337 | 0.6337 | 0.6337 |
| 2   | 0.9688        | 0.9688 | 0.7084 | 0.7282 | 0.6996 |
| 3   | 0.9689        | 0.9653 | 0.9607 | 0.7277 | 0.7174 |
| 4   | 0.9689        | 0.9672 | 0.9613 | 0.9539 | 0.7213 |
| 5   | <b>0.9690</b> | 0.9680 | 0.9649 | 0.9579 | 0.9479 |
