# Supplementary material for: Network-based Phenome-Genome Association Prediction by Bi-Random Walk
Source: PubMed Central journal article supplement (PMC4416812; doi:10.1371/journal.pone.0125138), 2015-05-01
Supplement: pone.0125138.s013.pdf [file pone.0125138.s013.pdf]

**Table S10. AUCs of PRINCE in 100-fold cross-validation on mouse phenome-genome network.** Parameter  $\alpha$  ranges from 0.01 to 0.9 for tuning better. AUCs up to 50, 100, 300, 500, 1000 and all false positives are reported.

|      | AUC <sub>50</sub> | AUC <sub>100</sub> | AUC <sub>300</sub> | AUC <sub>500</sub> | AUC <sub>1000</sub> | AUC    |
|------|-------------------|--------------------|--------------------|--------------------|---------------------|--------|
| 0.01 | 0.0670            | 0.1245             | 0.3183             | 0.4633             | 0.7014              | 0.9612 |
| 0.05 | 0.0671            | 0.1248             | 0.3184             | 0.4640             | 0.7019              | 0.9615 |
| 0.1  | 0.0684            | 0.1257             | 0.3183             | 0.4640             | 0.7018              | 0.9615 |
| 0.2  | 0.0670            | 0.1242             | 0.3174             | 0.4634             | 0.7015              | 0.9615 |
| 0.3  | 0.0658            | 0.1230             | 0.3165             | 0.4625             | 0.7009              | 0.9614 |
| 0.4  | 0.0651            | 0.1223             | 0.3156             | 0.4616             | 0.7001              | 0.9613 |
| 0.5  | 0.0651            | 0.1216             | 0.3145             | 0.4606             | 0.6989              | 0.9611 |
| 0.6  | 0.0640            | 0.1195             | 0.3125             | 0.4585             | 0.6967              | 0.9609 |
| 0.7  | 0.0626            | 0.1177             | 0.3115             | 0.4569             | 0.6934              | 0.9605 |
| 0.8  | 0.0612            | 0.1154             | 0.3090             | 0.4539             | 0.6870              | 0.9596 |
| 0.9  | 0.0594            | 0.1125             | 0.3071             | 0.4495             | 0.6728              | 0.9576 |
