# Supplementary material for: Network-based Phenome-Genome Association Prediction by Bi-Random Walk
Source: PubMed Central journal article supplement (PMC4416812; doi:10.1371/journal.pone.0125138), 2015-05-01
Supplement: pone.0125138.s014.pdf [file pone.0125138.s014.pdf]

**Table S11. CBG statistics on mouse phenome-genome network.** CBG analysis with randomized phenotype-gene network are reported for comparison.

|          | Mouse phenotype-gene network |          | Randomized phenotype-gene network |          |
|----------|------------------------------|----------|-----------------------------------|----------|
|          | Assoc #                      | Coverage | Avg. of Assoc #                   | Coverage |
| CBG1     | 2497                         | 25.48%   | 310.2                             | 3.17%    |
| CBG1 - 2 | 5038                         | 51.42%   | 1001.1                            | 10.22%   |
| CBG1 - 3 | 6434                         | 65.67%   | 1999.7                            | 20.41%   |
| CBG1 - 4 | 6993                         | 71.37%   | 2666.2                            | 27.21%   |
| CBG1 - 5 | 7252                         | 74.02%   | 2919.6                            | 29.80%   |
| CBG1 - 6 | 7462                         | 76.16%   | 3002.1                            | 30.64%   |
| CBG1 - 7 | 7613                         | 77.70%   | 3030.5                            | 30.93%   |
| CBG1 - 8 | 7704                         | 78.63%   | 3037.9                            | 31.01%   |
| CBG1 - 9 | 7818                         | 79.79%   | 3038.8                            | 31.01%   |
